# Supplementary material for: Methanol storage in high-pressure clathrate hydrates as a prolonged source of methane in large ocean worlds
Source: Research Square preprint supplement (doi:10.21203/rs.3.rs-5600760/v1), 2025-01-14
Supplement: Supplementary file 1 [file de9c76fe784dac70850ea673.pdf]

## Supplementary Materials

for the manuscript “Methanol storage in high-pressure clathrate hydrates as a prolonged  
source of methane in large ocean worlds”  
by Anna Pakhomova *et al.*

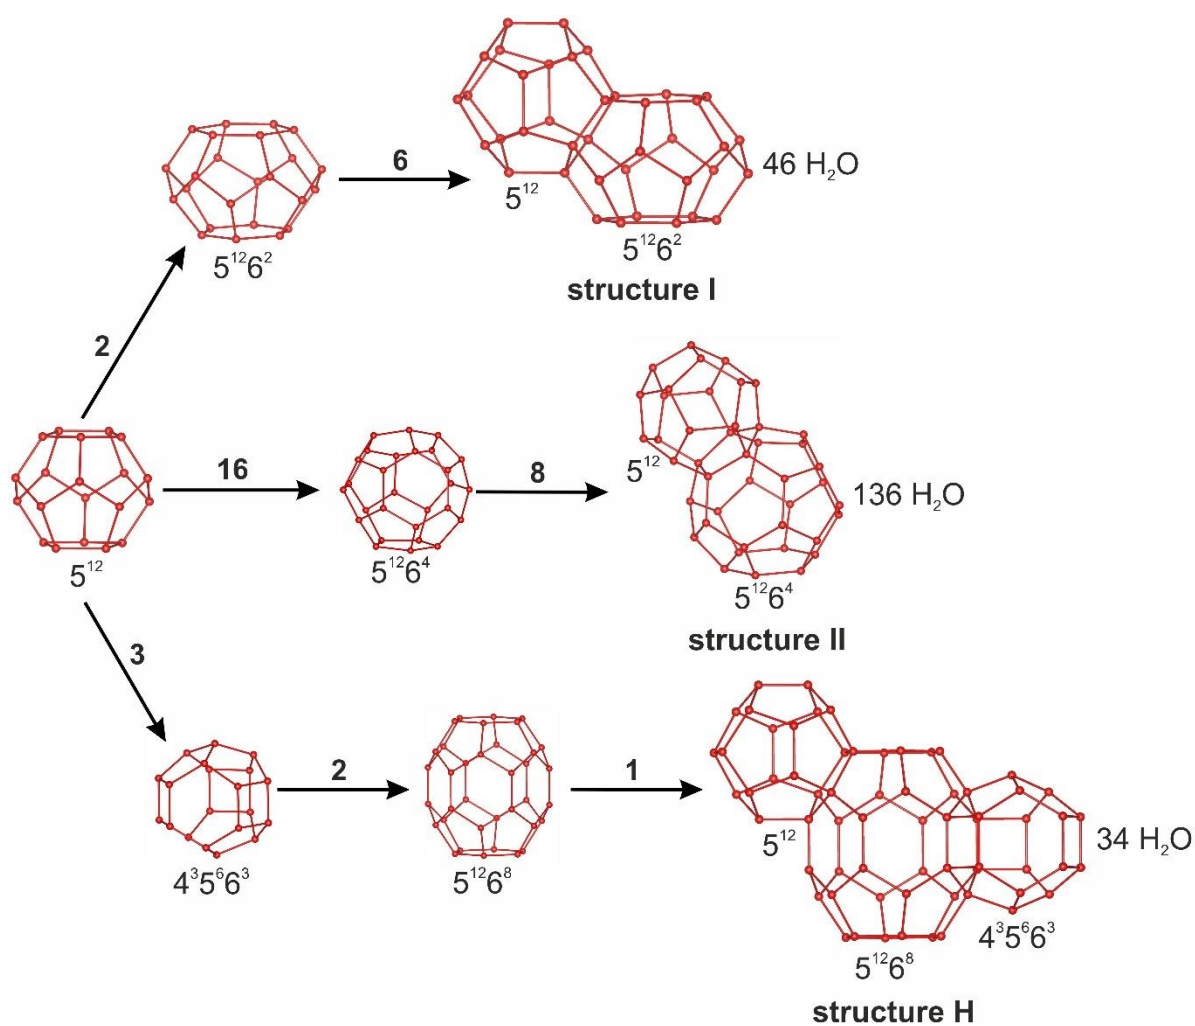

**Figure S1.** Framework topologies of sI, sII and sH clathrate hydrates that are formed under low temperature and near ambient pressure.

## Text S1. Experimental Methods

### S1.1 Temperature-pressure path of the THF-H<sub>2</sub>O experiment (Experiment 1)

The followed P-T path in **Experiment 1** is given in Figure S2.

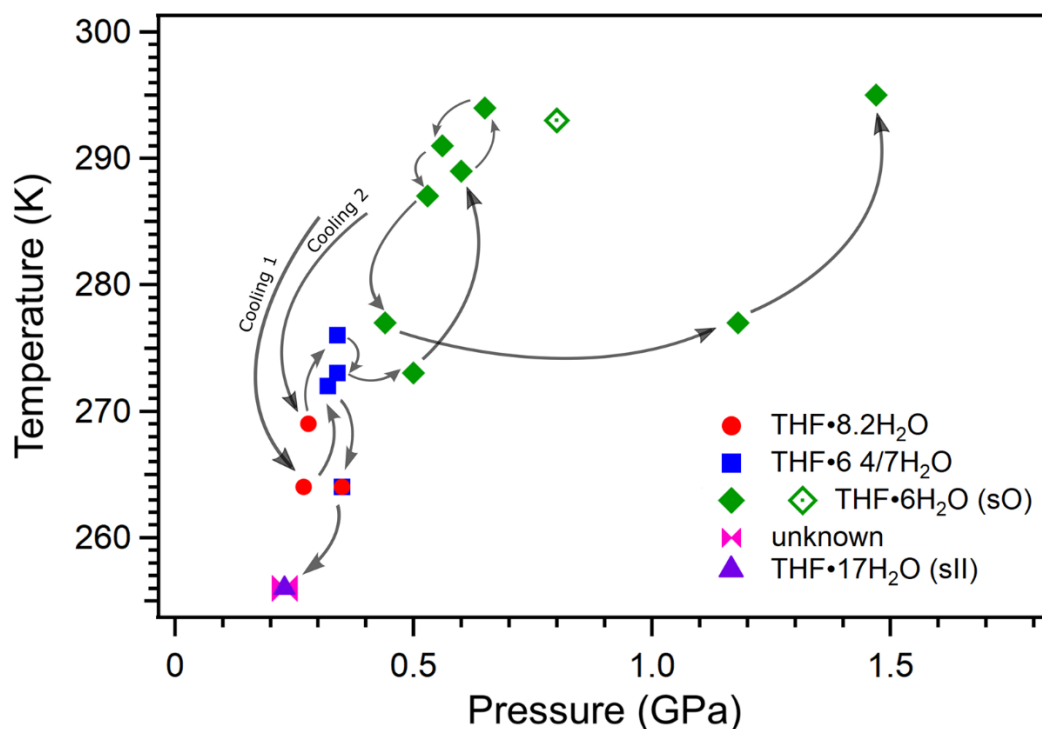

**Figure S2.** Pressure–temperature diagram indicating the conditions at which diffraction data for THF hydrates were collected in the present study in Experiment 1 (closed symbols). Open green rhombus corresponds to the P-T conditions where THF sO clathrate was previously observed by Kurnosov et al. (2004).

We started by cooling down the THF-H<sub>2</sub>O (1:3) solution at 0.4 GPa. After crystallization of THF•8.2H<sub>2</sub>O at 264 K (filled red circles in Figure S2, Figure S3a), the sample was slightly heated up in order to select few single crystals (Figure S3b). At 279 K the signs of melting have been observed and the sample was cooled down to 272 K. Upon cooling, the selected single crystal grew (Figure S3c). At this temperature and pressure of 0.32 GPa, THF•6 4/7H<sub>2</sub>O hydrate was detected (filled blue squares in Figure S2). Upon further cooling to 264 K, the formation of THF•8.2H<sub>2</sub>O has been observed again. At 264 K and 0.35 GPa THF•6 4/7H<sub>2</sub>O and THF•8.2H<sub>2</sub>O were found to be co-existing. During cooling, the crystals were continuously growing and filled almost all the chamber (Figure S3d,e). The sample was further cooled down and recrystallization occurred at 256 K (Figure S3f). The diffraction pattern of the polycrystalline sample which formed at these conditions was complex and represented a mixture of two phases: a sII clathrate hydrate (filled purple triangular in Figure S2) and an unknown phase with monoclinic symmetry and unit cell parameters  $a = 12.575(4)$  Å,  $b = 35.502(7)$  Å,  $c = 20.214(15)$  Å,  $\beta = 91.89(6)^\circ$  (filled pink symbol in Figure S2). The quality of the data did not allow us to determine the crystal structure of the monoclinic phase. Upon

38 heating, the sample melted at 274 K. Upon cooling, the solution crystallized again at 0.28 GPa  
39 and 269 K into THF•8.2H<sub>2</sub>O (Figure S3g). The temperature was again slightly increased to  
40 select few single crystals (Figure S3h) and in order not melt the crystals, also the pressure was  
41 slightly increased. Upon pressurization, the crystals grew (Figure S3i). At 0.34 GPa and 276  
42 K, the 6 4/7 hydrate was again detected. Further the sample was compressed to investigate the  
43 high-pressure region. Around 0.5 GPa, the 6 4/7 hydrate has recrystallized into THF•6H<sub>2</sub>O  
44 (filled green rhombus in Figure S2) with polycrystalline texture. In order to select few single  
45 crystals, the temperature was increased to 294 K (Figure S3j). The THF•6H<sub>2</sub>O was found to be  
46 stable up to the highest studied pressure of 1.47 GPa in the temperature range 277-295 K.

47

|          |                                                                                     |                                                                                                            |          |                                                                                      |                                                                  |
|----------|-------------------------------------------------------------------------------------|------------------------------------------------------------------------------------------------------------|----------|--------------------------------------------------------------------------------------|------------------------------------------------------------------|
| <b>a</b> | 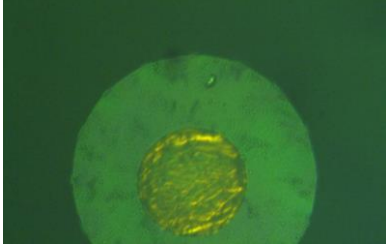   | <b>THF•8.2H<sub>2</sub>O</b><br>at 264 K and 0.27 GPa                                                      | <b>f</b> |    | <b>Mixture of sII and unknown phase</b><br>at 256 K and 0.23 GPa |
| <b>b</b> |    | <b>THF•6 4/7H<sub>2</sub>O</b><br>Upon heating,<br>~ 279 K                                                 | <b>g</b> |    | <b>THF•8.2H<sub>2</sub>O</b><br>at 269 K and 0.28 GPa            |
| <b>c</b> |   | <b>THF•6 4/7H<sub>2</sub>O</b><br>At 272 K and<br>0.32 GPa                                                 | <b>h</b> |   | Upon heating<br>Between 269 and<br>276 K                         |
| <b>d</b> |  | <b>THF•8.2H<sub>2</sub>O and THF•6 4/7H<sub>2</sub>O</b><br>at 264 K and 0.35 GPa<br>before cell centering | <b>i</b> |  | <b>THF•6 4/7 H<sub>2</sub>O</b><br>at 273 K and 0.34 GPa         |
| <b>e</b> |  | <b>THF•8.2H<sub>2</sub>O</b><br>at 264 K and 0.35 GPa<br>after cell centering                              | <b>j</b> |  | <b>THF•6H<sub>2</sub>O</b><br>at 294 K and 0.65 GPa              |

**Figure S3.** Photos of the sample chamber with corresponding pressure-temperature conditions in the course of Experiment 1 (THF-H<sub>2</sub>O solution). The diameter of the diamond culet is 600 μm.

## S1.2 Temperature-pressure path of THF-MeOH-H<sub>2</sub>O experiment (Experiment 2)

The followed P-T path in **Experiment 2** is given in Figure S4.

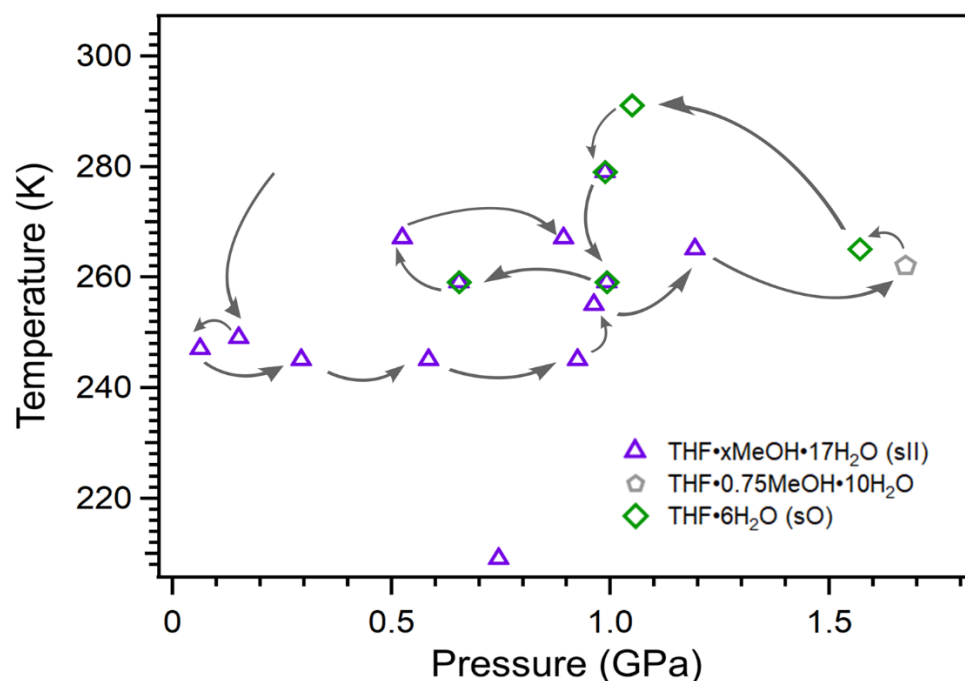

**Figure S4.** Pressure–temperature diagram indicating the conditions at which diffraction data for THF and THF-MeOH hydrates were collected in the present study in the Experiment 2.

We started by cooling down the THF-methanol (MeOH)-H<sub>2</sub>O solution, pressurised up to 0.35 GPa. The cubic sII clathrate crystallised at 249 K (open blue triangles in Figure S2, Figure S5a). The sample was heated up to 256 K to select few single crystals (Figure S5b) and then was cooled down to 247 K to preserve the selected crystals. Pressure was slightly increased to 0.3 GPa and temperature was decreased to 245 K to grow larger crystals (Figure S5c). At this temperature the sample was compressed up to 0.92 GPa. The sII phase was found to still be stable. In order to check the stability of this phase, it was heated to 255 K and further to 265 K. At 1.19 GPa and 265 K, only the sII was detected. Further pressure increase resulted in a formation of a new phase, determined as decahydrate (open grey pentagon in Figure S2). After the data collection at 1.67 GPa and 265 K, the sample has optically changed and the sample chamber became opaque (Figure S5d). This transformation resulted in the formation of a sO clathrate hydrate (open green rhombuses in Figure S2) causing a slight pressure drop to 1.57 GPa (Figure S5e). No optical changes have been observed upon heating up to 291 K and the sO clathrate was decompressed to 1.04 GPa (Figure S5f). Further the sample was cooled down and two phases have been detected at 279 K and 0.99 GPa: the sO and the sII. By decreasing the temperature from 279 to 259 K, the progressive growth of the sII phase was observed. At 259 K and 0.99 GPa still two phases were co-existing (Figure S5h). Pressure was decreased to 0.65 GPa where both phases still were present. The sample was warmed up to 267 K in order to destabilise one of the phases and indeed melting of the sO was observed upon temperature increase (Figure S5g). Pressure was increased up to 0.89 GPa where the sII was still present. The sII phase was preserved upon cooling down to 209 K (0.74 GPa).

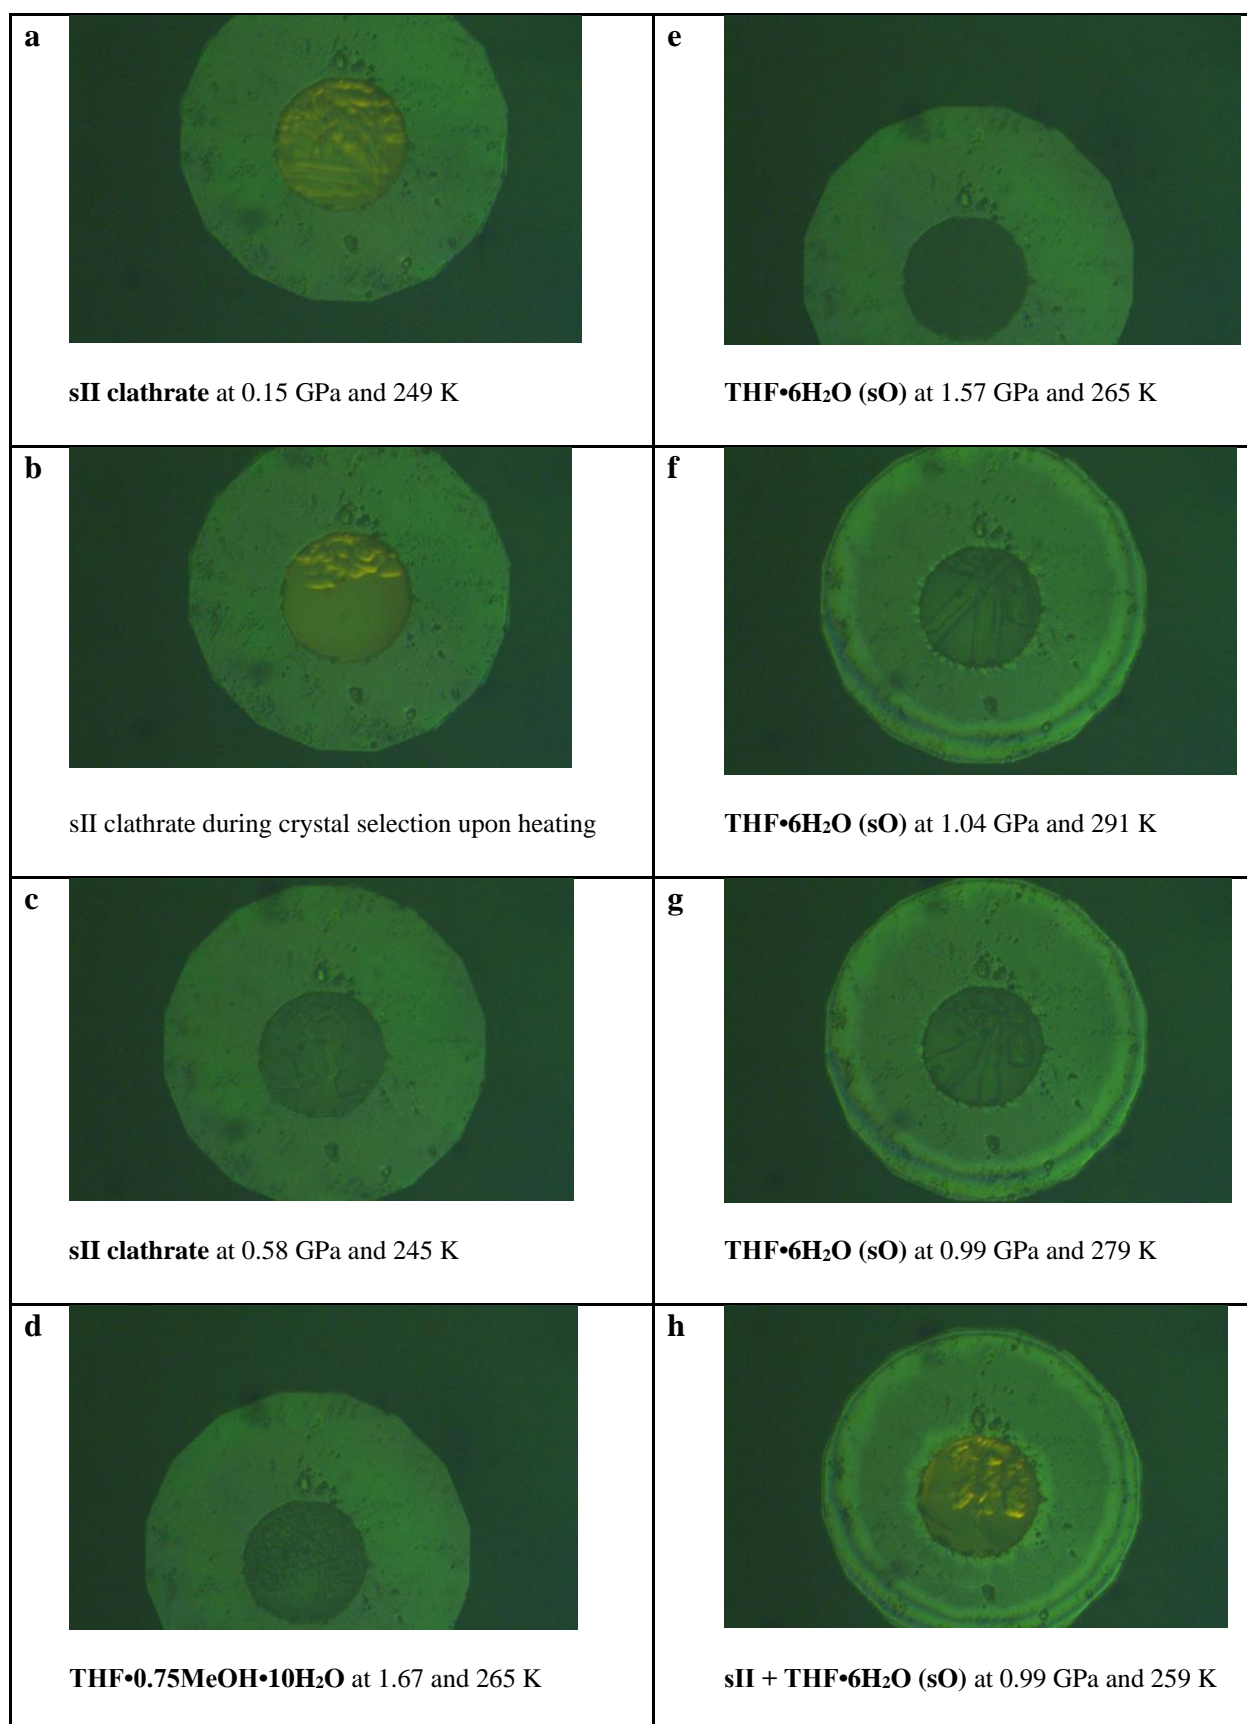

**Figure S5.** Photos of the sample chamber with corresponding pressure-temperature conditions in the course of Experiment 2 (THF-MeOH-H<sub>2</sub>O solution). The diameter of the diamond culet is 600  $\mu\text{m}$ .

Coordinates of the experimental points are summarized in Table S1:

**Table S1.** Experimental conditions of the observed phases in the Experiments 1 and 2.

| Experiment 1 |      |                                                     | Experiment 2 |      |                                             |
|--------------|------|-----------------------------------------------------|--------------|------|---------------------------------------------|
| P (GPa)      | T(K) | Phase                                               | P (GPa)      | T(K) | Phase                                       |
| 0.27         | 264  | THF•8.2H <sub>2</sub> O                             | 0.15         | 249  | THF• <i>x</i> MeOH•17H <sub>2</sub> O (sII) |
| 0.32         | 272  | THF•6 4/7H <sub>2</sub> O                           | 0.06         | 247  | THF• <i>x</i> MeOH•17H <sub>2</sub> O (sII) |
| 0.35         | 264  | THF•8.2H <sub>2</sub> O + THF•6 4/7H <sub>2</sub> O | 0.29         | 245  | THF• <i>x</i> MeOH•17H <sub>2</sub> O (sII) |
| 0.23         | 256  | THF•17H <sub>2</sub> O (sII) + unknown phase        | 0.58         | 245  | THF• <i>x</i> MeOH•17H <sub>2</sub> O (sII) |
| 0.28         | 269  | THF•8.2H <sub>2</sub> O                             | 0.92         | 245  | THF• <i>x</i> MeOH•17H <sub>2</sub> O (sII) |
| 0.34         | 276  | THF•6 4/7H <sub>2</sub> O                           | 1.19         | 265  | THF• <i>x</i> MeOH•17H <sub>2</sub> O (sII) |
| 0.34         | 273  | THF•6 4/7H <sub>2</sub> O                           | 1.67         | 265  | THF• 0.75MeOH•10H <sub>2</sub> O            |
| 0.50         | 273  | THF•6H <sub>2</sub> O (sO)                          | 1.57         | 265  | THF•6H <sub>2</sub> O (sO)                  |
| 0.60         | 289  | THF•6H <sub>2</sub> O (sO)                          | 1.04         | 291  | THF•6H <sub>2</sub> O (sO)                  |
| 0.65         | 294  | THF•6H <sub>2</sub> O (sO)                          | 0.99         | 279  | THF•6H <sub>2</sub> O (sO) + sII            |
| 0.56         | 291  | THF•6H <sub>2</sub> O (sO)                          | 0.99         | 259  | THF•6H <sub>2</sub> O (sO) + sII            |
| 0.53         | 287  | THF•6H <sub>2</sub> O (sO)                          | 0.94         | 259  | THF•6H <sub>2</sub> O (sO) + sII            |
| 0.44         | 277  | THF•6H <sub>2</sub> O (sO)                          | 0.65         | 259  | THF•6H <sub>2</sub> O (sO) + sII            |
| 1.18         | 277  | THF•6H <sub>2</sub> O (sO)                          | 0.52         | 267  | THF• <i>x</i> MeOH•17H <sub>2</sub> O (sII) |
| 1.47         | 295  | THF•6H <sub>2</sub> O (sO)                          | 0.89         | 267  | THF• <i>x</i> MeOH•17H <sub>2</sub> O (sII) |
|              |      |                                                     | 0.74         | 209  | THF• <i>x</i> MeOH•17H <sub>2</sub> O (sII) |



## Text S2. Structure solution and refinements

The crystal structures of several hydrates were solved using a dual-space algorithm implemented in the SHELXT program (Sheldrick 2015). The iterative structure refinements were performed with the use of the SHELXL program (Sheldrick 2015) built in the ShelXle (Hübschle et al. 2011) graphical user interfaces. Bragg reflections overlapping with reflections from the diamonds were excluded from the structure analysis. The details of structure refinements are given in the text below. The Crystallographic Information Files (CIFs) for the reported structures are deposited as Supporting Information.

### Text S2.1. Structure refinement of THF·8.2H<sub>2</sub>O

The intensity data of THF·8.2H<sub>2</sub>O were collected at P = 0.27 GPa and T = 264 K (Figure S2a) in Experiment 1 (THF-H<sub>2</sub>O solution). The THF·8.2H<sub>2</sub>O hydrate is hexagonal, with unit-cell lattice parameters  $a = 12.3979(8)$  Å,  $c = 24.661(10)$  Å and space group  $P6_3/mmc$ . The direct solution produced a model with seven oxygen atoms (O1-O7) building the hydrogen-bonded framework, composed of four types of cages: two small cages  $4^66^2$  (hexagonal prisms) and  $5^{12}$  (pentagonal dodecahedra, D cage) and two large ones,  $4^25^86^4_d$  (distorted, see below for the details) and  $5^{12}6^4$  (H cage). Regular geometry of these four cages is demonstrated in Figure S6 while comparison of the regular and distorted  $4^25^86^4$  cages are given in Figure S7. As shown, due to the flattening of the buckled 5-membered faces, the two oxygens are separated by more than 5 Å thus “opening” the cage and forming the channels. The O1-O7 oxygens are fully occupied and their thermal displacement parameters were refined isotropically. At this step,  $R_1$  was about 19% where  $R_1$  is a standard measure of agreement between the crystallographic model ( $F_c$ ) and the experimental X-ray diffraction data ( $F_o$ ) and defined as  $R_1 = \sum |F_o| - |F_c| / \sum |F_o|$ . Analysis of the remaining electron density maxima revealed the presence of another framework oxygen atom O8 featuring three-fold axial disorder. This results in the formation of unusual 7-membered distorted rings with O8-O4 separation of 2.672(15) Å. Other O-O distances, not including the O8, vary from 2.743(5) to 2.807(4) Å. The resulting framework topology is presented in the Figure 2a. Similar framework topology was reported previously for isopropylamine octahydrate, 10(CH<sub>3</sub>)<sub>2</sub>CHNH<sub>2</sub>·80H<sub>2</sub>O (McMullan et al. 1970), but never for THF. Disordered THF molecules were detected in the large cages  $4^25^86^4_d$  and  $5^{12}6^4$ . In the cages  $5^{12}6^4$ , two electron density maxima were assigned to two carbon atoms. Refinement of their site occupancy resulted close to unity within error, therefore the occupancy was constrained to 100%. Their thermal displacement parameters were refined anisotropically. This showed that the THF molecule is disordered in the  $ab$  plane around the [001] rotation axis (Figure S8). The disorder of THF in the larger  $4^25^86^4$  cage is more severe. We defined the four carbon atoms that do not form any regular arrangement. Assuming the full occupancy of THF molecules, the stoichiometry of this hydrate is defined as 10THF·82H<sub>2</sub>O. The data quality did not allow us to refine hydrogen positions due to weak scattering of the compound at high 2θ angles and due to usage of a diamond anvil cell that limits access to the reciprocal space. This approach allowed us to refine the crystal structure to an  $R_1$  of ~ 11 %.

|     |                                                               |                                                                                     |
|-----|---------------------------------------------------------------|-------------------------------------------------------------------------------------|
| (a) | $4^6 6^2$<br>(hexagonal prisms)<br><i>vacant</i>              | 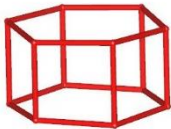  |
| (b) | $5^{12}$<br>(pentagonal dodecahedra, D cage)<br><i>vacant</i> |   |
| (c) | $4^2 5^8 6^4$<br><i>occupied</i>                              |   |
| (d) | $5^{12} 6^4$<br>(H cage)<br><i>occupied</i>                   |  |

**Figure S6.** Regular geometry of cages  $4^6 6^2$  (hexagonal prisms),  $5^{12}$  (pentagonal dodecahedra, D cage),  $4^2 5^8 6^4$ , and  $5^{12} 6^4$  (H cage) composing the hydrogen-bonded framework of THF·8.2H<sub>2</sub>O.

140  
141  
142  
143  
144  
145  
146  
147  
148  
149  
150  
151  
152  
153  
154

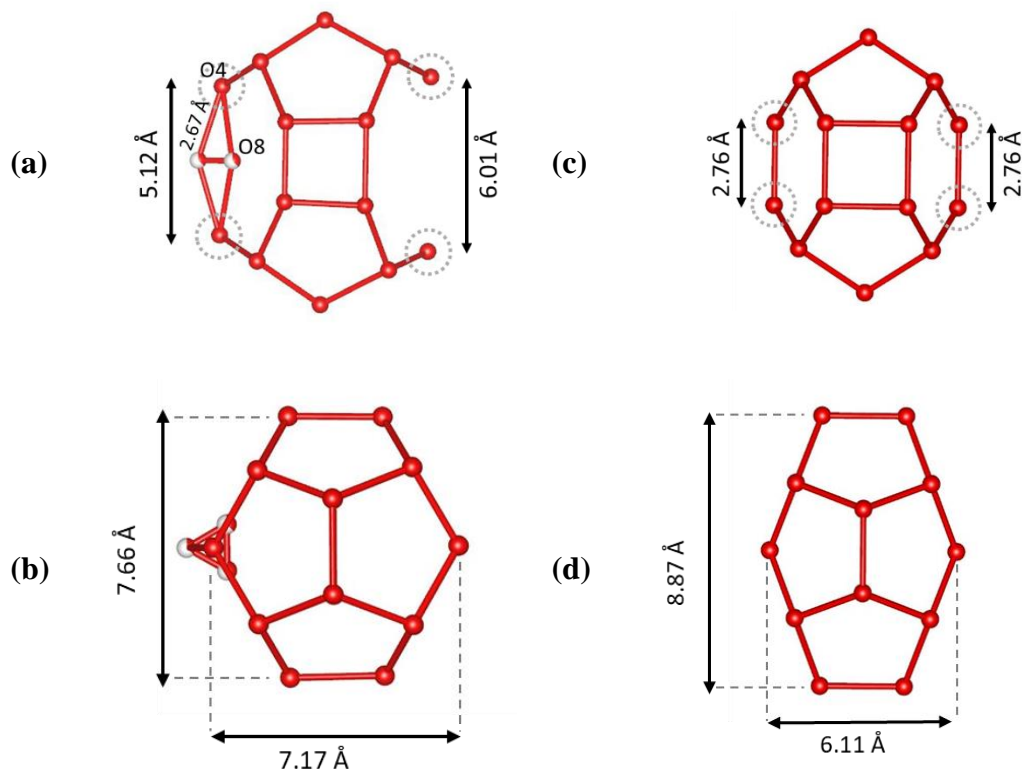

**Figure S7.** Comparison of the regular (right) and distorted (left) geometry of  $4^25^86^4$  cages along different projections. The regular polyhedron is drawn using the data on sT acetone clathrate from Pakhomova et al. 2022. Red circles represent oxygens of hydrogen-bonded water molecules.

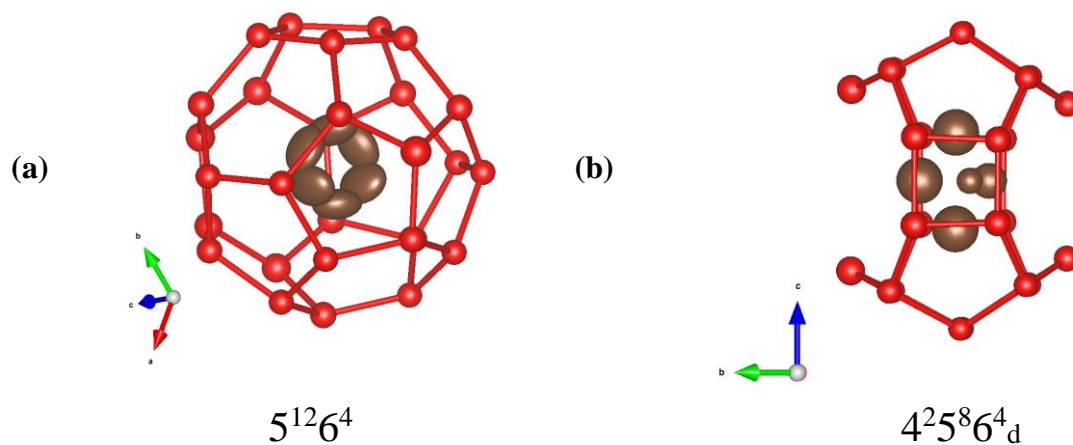

**Figure S8.** Disordered THF molecules in the  $5^{12}6^4$  (a) and  $4^25^86^4_d$  (b) cages of THF·8.2H<sub>2</sub>O. Ellipsoids are drawn at 50% probability level. Red balls represent oxygens of hydrogen-bonded water molecules while brown balls and ellipsoids represent parts of the disordered THF molecules.

## Text S2.2. Structure refinement of THF•6 4/7H<sub>2</sub>O

The intensity data of THF•6 4/7H<sub>2</sub>O were collected on a selected crystal at P = 0.32 GPa and T = 272 K (Figure S3c) in Experiment 1. THF•6 4/7H<sub>2</sub>O is hexagonal, with space group *P6/mmm* and unit cell dimensions  $a = 12.3899(12)$  and  $c = 14.7002(18)$  Å. The direct solution produced a model with  $R_1 \sim 30\%$  and with five oxygen atoms (O1-O5) building the hydrogen-bonded framework. Refinement of site occupancies of O1-O4 atoms resulted in close to unity within error, therefore their occupancy was constrained to 100%. Their thermal displacement parameters were refined isotropically. The O5 atom revealed high thermal displacement parameter and therefore was refined anisotropically. Defined in this way the hydrogen-bonded framework is composed of four types of cages (Figure S9):  $4^66^2$  (hexagonal prisms),  $5^{12}6^2_d$ ,  $4^25^86^4_d$ ,  $5^{12}6^3_d$  where the former three are distorted due to the O5-O5 separation of  $\sim 3.5$  Å (Figure S10). Other distances between adjacent oxygens of the host framework vary in the range  $2.743(7)$ - $2.845(10)$  Å. The resulting framework topology is presented in the Figure 2b. Analysis of the remaining electron density maxima revealed the presence of highly disordered THF molecules in the cages  $5^{12}6^2_d$ ,  $4^25^86^4_d$ ,  $5^{12}6^3_d$ . The highest electron density maxima above  $\sim 0.3$  e/Å<sup>3</sup> were assigned to carbon atoms and their occupancy and thermal anisotropic parameters have been refined (Figure S11). The data quality did not allow us to refine hydrogen positions due to the weak scattering of the compound at high  $2\theta$  angles and due to the diamond anvil cell that limits access to the reciprocal space. This approach allowed us to refine the crystal structure to  $R_1$  of  $\sim 12\%$ .

The same framework topology was recently described for 6 3/7 cyclobutylamine (cBA) hydrate (Dobrzycki et al. 2016) but never for THF. Dobrzycki et al. (2016) reported a partial substitution of the O5 framework oxygen with the amino group of the cBA occupying the  $5^{12}6^2$  cages. In our case, we do not see such effect and define the stoichiometry of this hydrate as 7THF•46H<sub>2</sub>O (THF•6 4/7 H<sub>2</sub>O).

|     |                                                  |                                                                                     |
|-----|--------------------------------------------------|-------------------------------------------------------------------------------------|
| (a) | $4^6 6^2$<br>(hexagonal prisms)<br><i>vacant</i> | 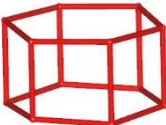   |
| (b) | $5^{12} 6^2$<br><i>occupied</i>                  |   |
| (c) | $4^2 5^8 6^4$<br><i>occupied</i>                 |    |
| (d) | $5^{12} 6^3$<br><i>occupied</i>                  |  |

**Figure S9.** Regular geometry of cages  $4^6 6^2$  (hexagonal prisms),  $5^{12} 6^2$ ,  $4^2 5^8 6^4$  and  $5^{12} 6^3$  composing the hydrogen-bonded framework of THF 6 4/7 hydrate.

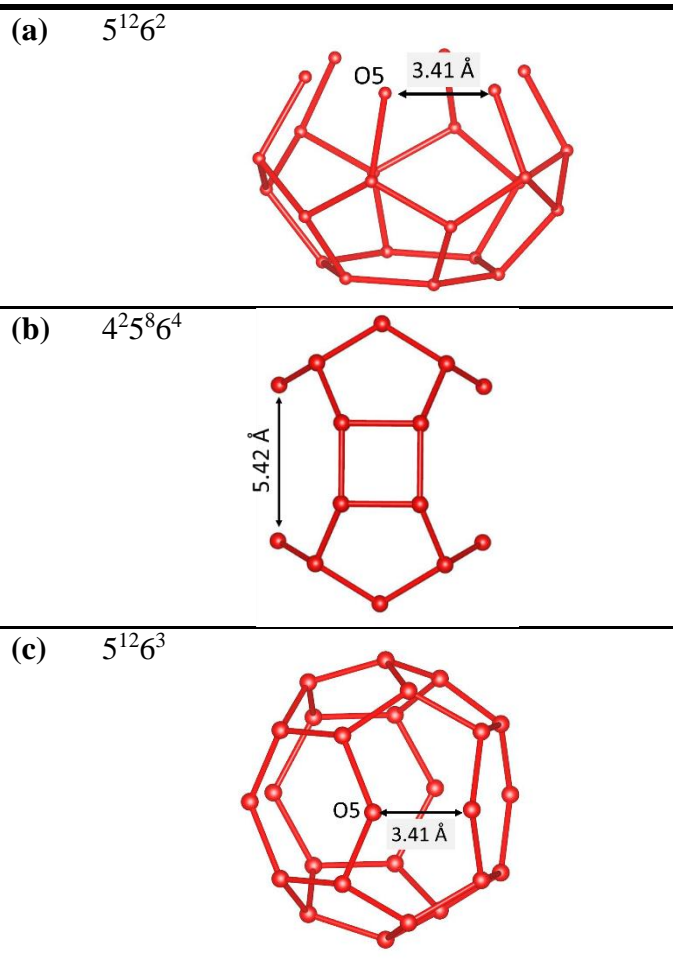

**Figure S10.** Distorted geometry of  $5^{12}6^2$  (a),  $4^25^86^4$  (b) and  $5^{12}6^3$  (c) cages composing the hydrogen-bonded framework of THF 6 4/7 hydrate. Red balls represent oxygens of hydrogen-bonded water molecules.

236  
237  
238

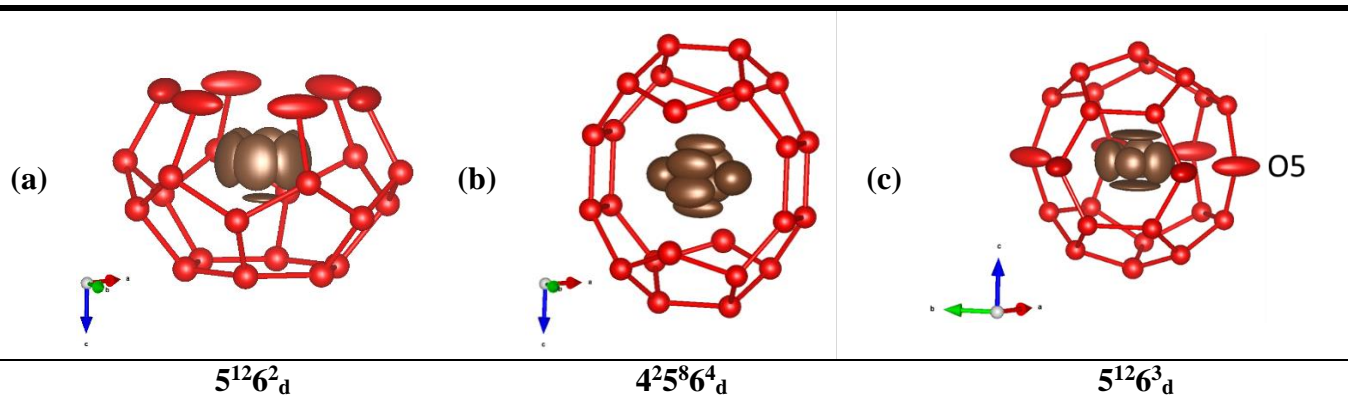

239  
240  
241  
242  
243  
244  
245  
246  
247

**Figure S11.** Disordered THF molecules in the  $5^{12}6^2_d$ ,  $4^25^86^4_d$  and  $5^{12}6^3_d$  cages of THF 6 4/7 H<sub>2</sub>O hydrate. Ellipsoids are drawn at 50% probability level. Red balls represent oxygens of hydrogen-bonded water molecules while brown balls and ellipsoids represent parts of the disordered THF molecules.



### Text S2.3. Structure refinement of THF•6H<sub>2</sub>O (sO)

The intensity data were collected on a selected crystal at  $P = 1.05$  GPa and  $T = 282$  K in Experiment 1. THF•6H<sub>2</sub>O (sO) is orthorhombic, with space group  $P2_12_12_1$  and unit cell dimensions  $a = 12.6149(10)$ ,  $b = 11.5016(6)$ , and  $c = 6.6353(2)$  Å. The direct solution produced a model with  $R_1 \sim 13$  % with three oxygen atoms (O1-O3) building the hydrogen-bonded framework and three carbon atoms located in its voids resembling geometry of a THF molecule. One of the intraframework carbon atoms was later assigned to the oxygen of THF molecule. All thermal displacement parameters were refined anisotropically. The THF molecule does not reveal high disorder however the APDs of its atoms are larger compared to the framework oxygens. The distances between adjacent oxygens of the host framework vary in the 2.762(5)–2.848(5) Å range. In contrast to the low-pressure clathrates of this study, the sO framework is constructed from unique cage type 4<sup>4</sup>5<sup>4</sup>6<sup>6</sup> (Figures S12, Figure 2d). The data quality did not allow us to refine the hydrogen positions due to the weak scattering of the compound at high  $2\theta$  angles and due to the diamond anvil cell that limits access to the reciprocal space. The crystal structure was refined to 9.5 %.

The sO structure was previously described for THF (Kurnosov et al. 2004) at 0.8 GPa and acetone (Manakov et al. 2007; Pakhomova et al. 2022) clathrate hexahydrates. Interestingly, our refinement shows that the oxygen of the THF molecule is located at 3.493(9) Å from the closest framework oxygen, indicating that there is no host-guest hydrogen bonding, as it was previously described for the acetone clathrate of the same structure type (Pakhomova et al. 2022).

271

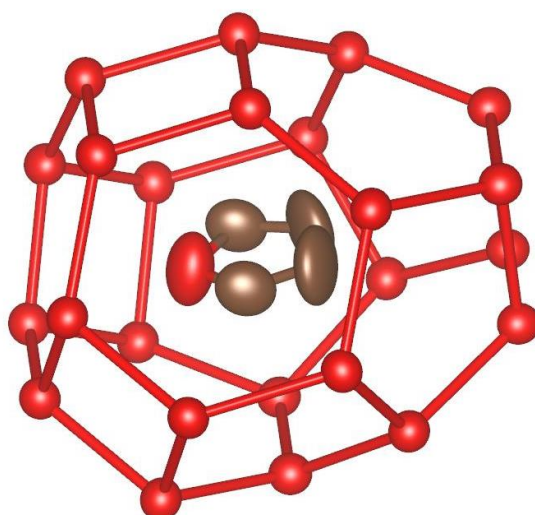

272

273

274 **Figure S12.** The  $4^45^46$  cage composing the framework of the sO THF clathrate hydrate. The  
275 ellipsoids are drawn at 50% probability level. Red balls represent oxygens of hydrogen-bonded  
276 water molecules. Red and brown ellipsoids represent oxygen and carbons atoms of THF  
277 molecule, respectively.

278

279

#### **Text S2.4. Structure refinement of THF·xMeOH·17H<sub>2</sub>O (sII)**

The data presented here were collected in the course of Experiment 2 (THF-MeOH-H<sub>2</sub>O solution). Upon cooling of the pressurised solution, the cubic sII clathrate, with space group *Fd-3m* and unit cell dimension  $a = 12.644(4)$  Å has crystallised at 0.15 GPa and 249 K.

The direct solution produced a model with three oxygen atoms (O1-O3) building the hydrogen-bonded framework. The defined hydrogen-bonded framework is composed of two types of cages: small 5<sup>12</sup> cages (D) and large 5<sup>12</sup>6<sup>4</sup> (H) (Figure S1, S13). Analysis of the remaining electron density maxima revealed the presence of a 1.5 e/Å<sup>3</sup> electron density peak in the center of the 5<sup>12</sup> cages that was assigned to the carbon atom (C1) of the methanol molecule. Several peaks in the 5<sup>12</sup>6<sup>4</sup> cage were assigned to carbon atoms of the highly disordered THF molecules. The remaining electron density peak in the proximity of the C1 was defined as an oxygen atom of the methanol molecule (O4). Upon pressurisation at nearly the same temperature of 245-249 K, the sII clathrate persisted at least up to 0.92 GPa. At every pressure point, occupancy and anisotropic displacement parameters of the O1-O3 atoms were refined. The occupancy of C1 was refined as well while its thermal parameter was fixed to the value refined at the highest pressure studied when its occupancy reaches unity. The evolution of the unit-cell parameters, refined occupancies, and selected distances versus pressure are given in Table S2 and S3. We note that C1 is located at a special position resulting in a larger error in the determination of the site occupancy as described in de Wolff (1966). The data quality did not allow us to refine the hydrogen positions due to the weak scattering of the compound at high 2θ angles and due to the diamond anvil cell that limits access to the reciprocal space. This approach allowed us to refine the crystal structure to R<sub>1</sub> of 7-8 % at all pressure points.

304  
305

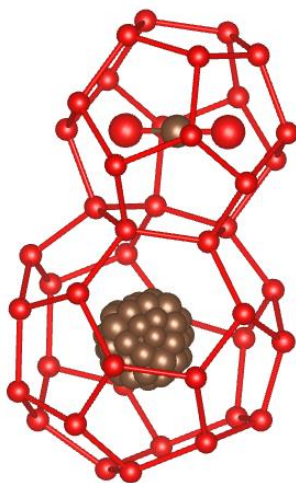

306  
307  
308  
309  
310

**Figure S13.** Two cages building the framework of sII THF-MeOH clathrate hydrate. Red and brown balls represent oxygen and carbon atoms, respectively.

**Table S2.** Evolution of unit cell parameters and occupancies of selected atomic sites of sII THF-MeOH clathrate hydrate upon pressurization at about 245-249 K.

| dataset | P (GPa) | T (K) | a (Å)      | V(Å <sup>3</sup> ) | C1       | O4        | O1       | O2       | O3       |
|---------|---------|-------|------------|--------------------|----------|-----------|----------|----------|----------|
| _0008   | 0.152   | 249   | 17.2978(6) | 5175.7(5)          | 0.62(9)  | 0.05(2)   | 1.01(13) | 0.93(12) | 0.82(11) |
| _0016   | 0.2945  | 247   | 17.2292(4) | 5114.4(4)          | 0.69(10) | 0.08(4)   | 1.01(15) | 1.01(15) | 0.88(13) |
| _0021   | 0.585   | 245   | 17.0543(4) | 4960.2(3)          | 1        | 0.034(17) | 0.99(5)  | 0.89(5)  | 0.85(6)  |
| _0023   | 0.926   | 245   | 16.8867(5) | 4815.4(4)          | 1        | -         | 0.94(8)  | 0.88(7)  | 0.88(9)  |

**Table S3.** Evolution of selected bond distances of sII THF-MeOH clathrate upon pressurization at about 245-249 K.

| dataset | P (GPa) | T (K) | C1-O1 (Å)  | C1-O2 (Å)  | C1-O3 (Å)   |
|---------|---------|-------|------------|------------|-------------|
| _0008   | 0.152   | 249   | 3.9583(10) | 3.8489(12) | 3.74509(12) |
| _0016   | 0.2945  | 247   | 3.9444(9)  | 3.8390(11) | 3.73023(8)  |
| _0021   | 0.585   | 245   | 3.9046(11) | 3.7940(13) | 3.69236(8)  |
| _0023   | 0.926   | 245   | 3.8666(16) | 3.7562(19) | 3.65607(10) |

#### Text S2.4. Structure refinement of THF•0.75MeOH•10H<sub>2</sub>O (decahydrate)

The intensity data of THF•0.75MeOH•10H<sub>2</sub>O decahydrate were collected on a selected crystal at P = 1.67 GPa and T = 265 K in Experiment 2. THF•10H<sub>2</sub>O is hexagonal, with space group *P6/mmm* and unit cell dimensions  $a = 11.8229(9)$ , and  $c = 11.949(4)$  Å. The direct solution produced a model with  $R_1 \sim 30\%$  and with five oxygen atoms (O1-O5) building the hydrogen-bonded framework. Refinement of the site occupancies of oxygen atoms resulted in close to unity within error, therefore their occupancy was constrained to 100%. Thermal displacement parameters of the O1-O4 atoms were refined isotropically. The O5 atom revealed high thermal displacement parameter and therefore was refined anisotropically. Defined in this way the hydrogen-bonded framework is composed of three types of cages (Figure S14):  $5^{12}$ ,  $5^{12}6^2_d$ ,  $5^{12}6^3_d$ , where the former two are slightly distorted due to the O5-O5 separation of  $\sim 3$  Å. Analysis of the remaining electron density maxima revealed the presence of disordered THF molecules in the cages  $5^{12}6^2_d$  and  $5^{12}6^3_d$ . The highest electron density maxima above  $\sim 0.3$  e/Å<sup>3</sup> in the  $5^{12}6^2_d$  and  $5^{12}6^3_d$  cages were assigned to carbon atoms and both their occupancy and thermal anisotropic parameters have been refined (Figure S15a,b). The strong electron density peak in the center of the  $5^{12}$  cage was assigned to the carbon atom of the methanol molecule (Figure S15c). The data quality did not allow us to refine the hydrogen positions due to the weak scattering of the compound at high  $2\theta$  angles and due to the diamond anvil cell that limits access to the reciprocal space. This approach allowed us to refine the crystal structure to  $R_1$  of  $\sim 12\%$ .

346

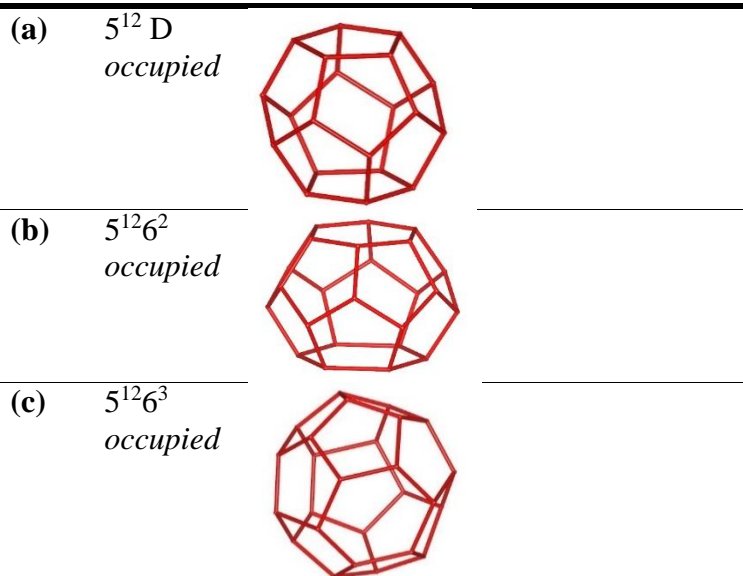

347 **Figure S14.** Regular  $5^{12}$ ,  $5^{12}6^2$ ,  $5^{12}6^3$  case composing THF-MeOH decahydrate.

348

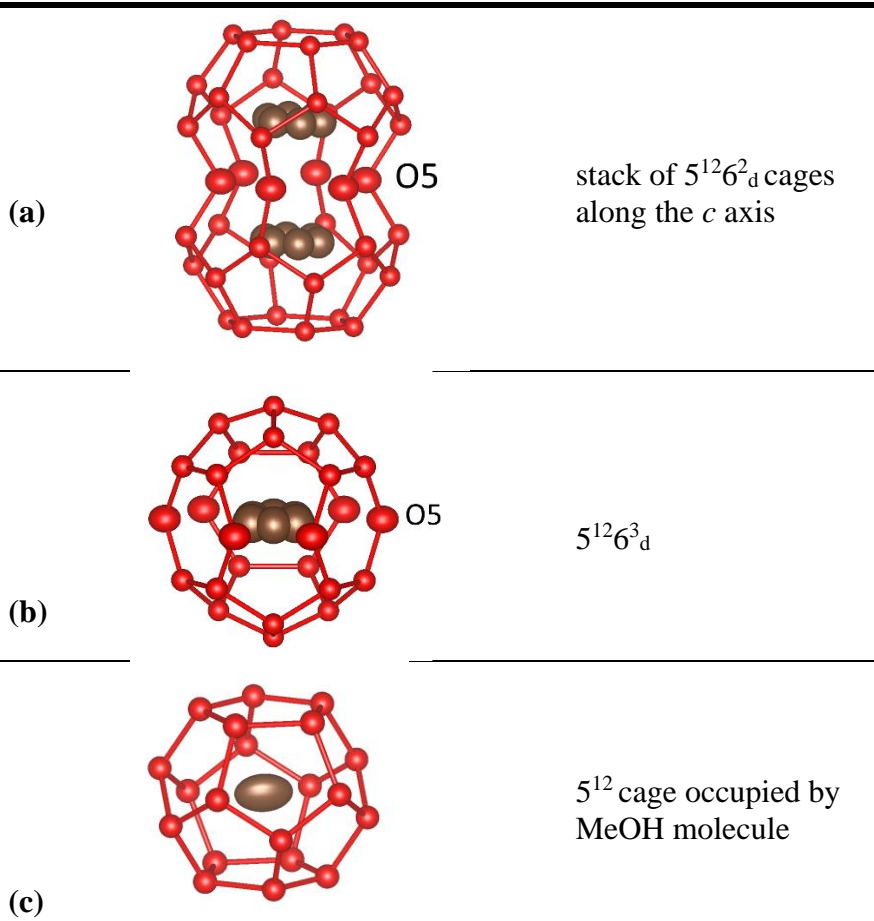

**Figure S15.** Occupancy of the  $5^{12}$ ,  $5^{12}6^2_d$ , and  $5^{12}6^3_d$  cases composing THF-MeOH decahydrate. The ellipsoids are drawn at 50% probability level.



## References

- de Wolff, P.M. (1966) A simple rule for the electron-density error at special positions. *Acta Crystallographica*, 20, 141–141.
- Dobrzycki, Ł., Pruszkowska, K., Boese, R., and Cyrański, M.K. (2016) Hydrates of Cyclobutylamine: Modifications of Gas Clathrate Types sI and sH. *Crystal Growth & Design*, 16, 2717–2725.
- Hübschle, C.B., Sheldrick, G.M., and Dittrich, B. (2011) ShelXle: a Qt graphical user interface for SHELXL. *Journal of Applied Crystallography*, 44, 1281–1284.
- Kurnosov, A.V., Komarov, V.Y., Voronin, V.I., Teplykh, A.E., and Manakov, A.Y. (2004) New Clathrate Hydrate Structure: High-Pressure Tetrahydrofuran Hydrate with One Type of Cavity. *Angewandte Chemie International Edition*, 43, 2922–2924.
- Manakov, A.Yu., Ogienko, A.G., Komarov, V.Yu., Ancharov, A.I., and Sheromov, M.A. (2007) High-pressure clathrate hydrate of acetone. *Journal of Inclusion Phenomena and Macrocyclic Chemistry*, 58, 317–320.
- McMullan, R.K., Jeffrey, G.A., and Panke, D. (1970) Polyhedral Clathrate Hydrates. XVI. Structure of Isopropylamine Octahydrate. *The Journal of Chemical Physics*, 53, 3568–3577.
- Pakhomova, A., Collings, I.E., Journaux, B., Petitgirard, S., Boffa Ballaran, T., Huang, D., Ott, J., Kurnosov, A., Hanfland, M., Garbarino, G., and others (2022) Host–Guest Hydrogen Bonding in High-Pressure Acetone Clathrate Hydrates: In Situ Single-Crystal X-ray Diffraction Study. *The Journal of Physical Chemistry Letters*, 13, 1833–1838.
- Sheldrick, G.M. (2015) Crystal structure refinement with SHELXL. *Acta Crystallographica Section C: Structural Chemistry*, 71, 3–8.
